# Supplementary material
Source: Springer Nature journal article supplement (https://www.springermedizin.de/resource/supplementary/12985_2010_1050_MOESM3_ESM.pdf/9609034)

**A.**

|           | G079-3 | G090-2 | G090-3 | G106-1 | G153-1 | G165-1 | G193-1 | G327-2 | G337-1 | G408-2 | G418-11 | G443-12 | G540-4 | G551-3 | G579-1 | G598-2 | G590-1 | G610-1 | G617-1 | 293T ctrl | 293T/GPC | L VLP |   |
|-----------|--------|--------|--------|--------|--------|--------|--------|--------|--------|--------|---------|---------|--------|--------|--------|--------|--------|--------|--------|-----------|----------|-------|---|
| Trad Ag   | +      | +      | +      | -      | -      | -      | +      | +      | +      | +      | -       |         | +      | -      | -      |        | +      | +      | +      |           |          |       |   |
| Trad IgG  | +      | -      |        | +      | ±      |        | -      |        | -      | -      |         |         | -      | -      | -      | -      | -      | -      | -      |           |          |       |   |
| Trad IgM  | -      | +      |        | +      | +      | +      | -      | -      | -      | +      | -       |         | +      | -      | +      | +      | ±      | +      | +      |           |          |       |   |
| r Ag (NP) | +      | -      | -      |        |        |        | +      |        | +      |        | -       |         |        |        | -      | -      |        | -      | -      |           |          |       |   |
| r IgG     | ±      | -      |        | +      | +      |        | -      |        | ±      | +      |         |         | -      | +      | +      | +      | -      | +      | -      |           |          |       |   |
| r IgM     |        |        |        |        |        |        |        |        |        |        |         |         | -      | -      | +      | +      | -      | +      | +      |           |          |       |   |
| GPI WB    | +      | -      | -      | -      | -      | -      | -      | -      | +      | -      | -       | -       | -      | -      | -      | -      | -      | -      | -      | -         | -        | +     | + |
| NP WB     | -      | -      | +      | -      | -      | -      | -      | -      | -      | -      | -       | -       | -      | -      | -      | -      | -      | -      | -      | -         | -        | +     | + |
| outcome   | E      | d      |        | d      | E      | E      | E      | d      | na     | d      | d       | d       | d      | d      | E      | na     | E      | d      | d      | N/A       | N/A      | N/A   |   |

**B.**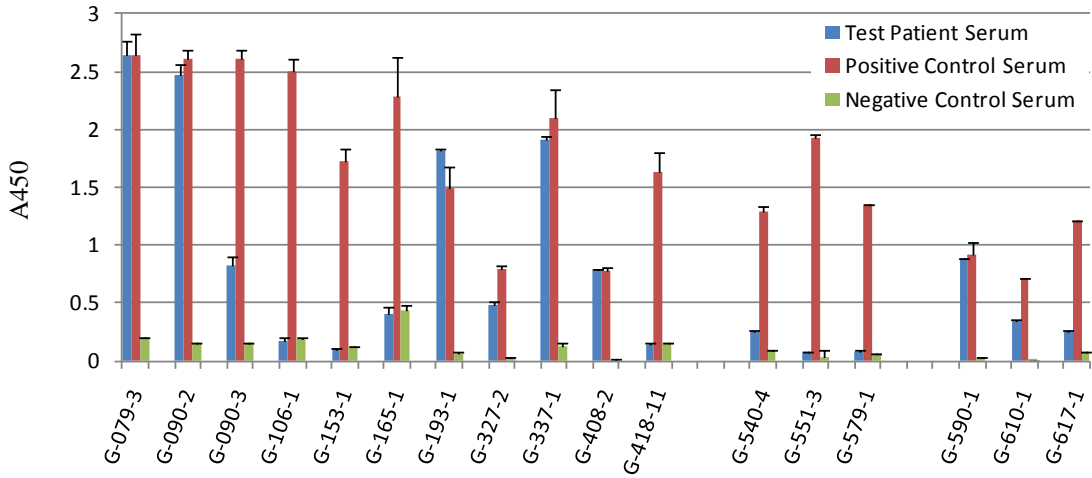**C.**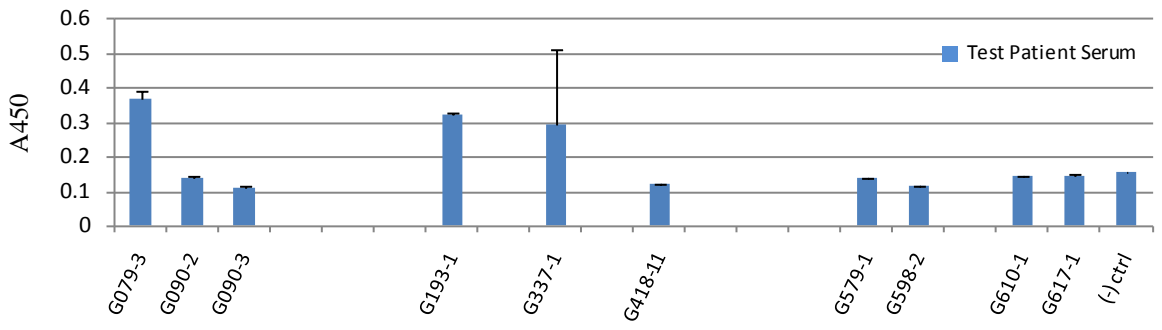

Supplement: MOESM3 [file 9609034]
